# Supplementary material for: Scutellarin Exerts Hypoglycemic and Renal Protective Effects in db/db Mice via the Nrf2/HO-1 Signaling Pathway
Source: Hindawi journal article supplement (doi:10.1155/2019/1354345), 2019-02-10
Supplement: f1 [file 1354345.f1.pdf]

## Supplementary materials

Table.1s: The primer sequences used in RT-PCR

Table.2s: The detail parameters of target cytokines decreased or increased over 50% folds among experimental groups, which were measured using the L-series mouse antibody array kit. Among 308 target cytokines related to inflammation, 28 of them were strongly upregulated, and one of them was decreased over 50% folds in vehicle-treated db/db mice compared with db/m<sup>+</sup> mice. The 50 and 100 mg/kg of SCU for 19 and 24 types of cytokines changed, respectively, compared with vehicle-treated db/db mice.

Table.3s: The regulatory effects of SCU and Met on the levels of inflammatory cytokines. The levels of inflammatory cytokines in the serum and/or kidney were measured using enzyme-linked immunosorbent assay kits according to the manufacturer's instructions. Compared with db/m<sup>+</sup> mice, no significant alterations of several cytokines levels occurred in db/db mice, including MMP-9, TNF- $\alpha$ , IL-6, IL-8, ICAM-1, MCP-5, TGF- $\beta$ 1/2 and IFN- $\beta$ . Also, SCU treatment for 8 weeks had no influences on those cytokines levels in db/db mice.

## Supplementary table list

**Table. 1s** The primer sequences used in RT-PCR

| Fragment size (bp) | Name    | Sequence(5' to 3')         |
|--------------------|---------|----------------------------|
| 120                | RAGE-F  | TATTGTCGCTTATAACCGCAGTT    |
|                    | RAGE-R  | ACATTTCTTGCCAGGTGGT        |
| 126                | NGAL-F  | GTCAGAGCCCTTGGAAGATG       |
|                    | NGAL-R  | AGAGGAGACAATGTGCAGAAG      |
| 75                 | KIM-1-F | ATCAGATTCAAGTCTTCATTTTCAGG |
|                    | KIM-1-R | CCTTTACTTCCACATAAGAATCCAC  |
| 121                | Cd11b-F | CTGAACATCCCATGACCTTCC      |
|                    | Cd11b-R | CCTGTCTGGTTAACAGCCTTT      |
| 78                 | Cd3-F   | AACACGTA CTGTACCTGAAAAGCTC |
|                    | Cd3-R   | GATGATTATGGCTACTGCTGTCA    |
| 233                | GAPDH-F | GGTGAAGGTCGGTGTGAACG       |
|                    | GAPDH-R | CTCGCTCCTGGAAGATGGTG       |

**Table.2s** The detail parameters of target cytokines decreased or increased over 50% folds among experimental groups.

| Coordinate | Target                                    | Fold                              |                                       |                                        |
|------------|-------------------------------------------|-----------------------------------|---------------------------------------|----------------------------------------|
|            |                                           | db/db<br>(vs. db/m <sup>+</sup> ) | db/db+ 50 mg/kg<br>SCU<br>(vs. db/db) | db/db+ 100<br>mg/kg SCU<br>(vs. db/db) |
| A 11; A 12 | Activin A                                 | 57.8%                             | --                                    | 90.2%                                  |
| A 15; A 16 | Activin RIB / ALK-4                       | --                                | 87.2%                                 | --                                     |
| B 3; B 4   | Axl                                       | 164.6%                            | --                                    | --                                     |
| B 5; B 6   | b FGF                                     | 54.5%                             | --                                    | --                                     |
| B 13; B 14 | beta-Catenin                              | 54.3%                             | --                                    | --                                     |
| B 15; B 16 | BLC                                       | --                                | --                                    | 119.5%                                 |
| B 17; B 18 | BTC(Betacellulin)                         | --                                | --                                    | 53.2%                                  |
| B 19; B 20 | Cardiotrophin-1                           | 60.6%                             | --                                    | --                                     |
| D 3;D 4    | CD40 Ligand / TNFSF5                      | 57.2%                             | --                                    | --                                     |
| D 9;D 10   | Coagulation Factor III /<br>Tissue Factor | --                                | --                                    | 53.8%                                  |
| D 13;D 14  | CRG-2                                     | 235.8%                            | --                                    | 127.5%                                 |
| D 21;D 22  | Csk                                       | 51.3%                             | --                                    | --                                     |
| E 11; E 12 | DAN                                       | --                                | 51.9%                                 | 102.6%                                 |
| E 13; E 14 | Decorin                                   | --                                | 57.2%                                 | 52.4%                                  |
| E 15; E 16 | DKK-1                                     | --                                | --                                    | 57.9%                                  |
| F 13; E 14 | Eotaxin-2                                 | 57.7%                             | --                                    | --                                     |
| G 9; G10   | FGF R5 beta                               | --                                | --                                    | 54.3%                                  |
| G 13; G14  | Fit-3 Ligand                              | 97.6%                             | --                                    | 68.1%                                  |
| G 15; G16  | FLRG(Follistain)                          | --                                | --                                    | 95.1%                                  |
| G 21; G 22 | Frizzled-1                                | 50.2%                             | --                                    | --                                     |
| H 1; H 2   | G-CSF                                     | 105.4%                            | --                                    | --                                     |
| H 19; H 20 | GITR                                      | -66.2%                            | 176.8%                                | 568.7%                                 |
| H 27;H 28  | Granzyme B                                | 56.8%                             | -62.5%                                | --                                     |
| I 5;I 6    | Gremin                                    | --                                | --                                    | 76.0%                                  |
| I 7;I 8    | Growth Hormone R<br>(GHR)                 | --                                | --                                    | 65.2%                                  |
| I 11;I 12  | HGF                                       | --                                | 67.1%                                 | 132.0%                                 |
| I 17;I 18  | ICAM-2/CD102                              | 60.8%                             | --                                    | --                                     |
| I 25;I 26  | IFN-alpha/beta R2                         | --                                | -55.4%                                | --                                     |
| J 13;J 14  | IGFBP-6                                   | 74.0%                             | --                                    | --                                     |
| J 17;J 18  | IGF-I                                     | 55.0%                             | --                                    | --                                     |
| J 23;J 24  | IL-1 beta                                 | 96.0%                             | --                                    | --                                     |
| J 27;J 28  | IL-1 R6 / IL-1 Rrp2                       | 91.8%                             | --                                    | --                                     |
| K 19; K 20 | IL-4                                      | 325.6%                            | 81.9%                                 | 107.4%                                 |
| K 21; K 22 | IL-4 R                                    | 86.6%                             | --                                    | --                                     |
| L 13; L 14 | IL-7 R alpha                              | --                                | 66.1%                                 | 120.0%                                 |
| L 21; L 22 | IL-10 R alpha                             | 63.1%                             | --                                    | --                                     |

|            |                        |        |        |        |
|------------|------------------------|--------|--------|--------|
| L 5; L 6   | IL-13 R alpha 2        | --     | 63.6%  | 72.0%  |
| L 7; L 8   | IL-15                  | --     | 67.5%  | --     |
| L 15; L 16 | IL-17BR                | 89.1%  | --     | --     |
| M 3;M 4    | IL-18 R alpha /IL-1 R5 | --     | 105.4% | 67.5%  |
| M 25; M 26 | IL-28/IFN-lambda       | --     | -71.6% | --     |
| M 27; M 28 | IL-31                  | --     | 55.4%  | --     |
| N 1;N 2    | IL-31 RA               | --     | 56.0%  | --     |
| N 17;N 18  | Leptin R               | 143.2% | --     | 83.3%  |
| N 19;N 20  | LEPTIN(OB)             | --     | --     | 52.4%  |
| N 21;N 22  | LIF                    | 75.4%  | --     | --     |
| O 9; O 10  | MadCAM-1               | --     | 57.2%  | --     |
| P 13;P 14  | MCP-5                  | 123.5% | --     | --     |
| P 15; P 16 | M-CSF                  | 87.1%  | --     | 133.9% |
| P 25; P 26 | MIP-1 alpha            | --     | -50.2% | --     |
| P 27; P 28 | MIP-1 gamma            | 51.1%  | --     | --     |
| Q 7; Q 8   | MMP-2                  | --     | 70.2%  | --     |
| R 17;R 18  | PIGF-2                 | --     | --     | 58.9%  |
| R 27;R 28  | RANTES                 | 81.9%  | --     | --     |
| S 13; S 14 | Serum Amyloid A1       | --     | 65.0%  | 62.0%  |

--: Beyond of the limit (The fold is greater than - 50% and less than 50%).

**Table.3s** The regulatory effects of SCU and Met on the levels of inflammatory cytokines

|        |                            | db/m <sup>+</sup> | db/db            | db/db + Met (mg/kg) |                  | db/db + SCU (mg/kg) |                  |
|--------|----------------------------|-------------------|------------------|---------------------|------------------|---------------------|------------------|
|        |                            |                   |                  | 120                 | 25               | 50                  | 100              |
| Serum  | IFN- $\beta$ (pg/mL)       | 319.9 $\pm$ 52    | 344.3 $\pm$ 14.1 | 347.1 $\pm$ 27.5    | 320.7 $\pm$ 45.5 | 333.6 $\pm$ 25.8    | 317.4 $\pm$ 14.7 |
|        | IL-6 (pg/ml)               | 67.7 $\pm$ 0.9    | 60.4 $\pm$ 1.5   | 69.9 $\pm$ 1.5      | 65.6 $\pm$ 3.2   | 62.9 $\pm$ 1.1      | 65.6 $\pm$ 2     |
|        | TNF- $\alpha$ (pg/mL)      | 32.4 $\pm$ 0.4    | 32.7 $\pm$ 0.5   | 29.3 $\pm$ 1.6      | 32.8 $\pm$ 1.5   | 28.1 $\pm$ 2.1      | 28.1 $\pm$ 2.5   |
|        | TGF- $\beta$ 1/2 (ng/mL)   | 118.3 $\pm$ 1.2   | 115 $\pm$ 1.1    | 113.6 $\pm$ 2.7     | 117.5 $\pm$ 3.5  | 119.8 $\pm$ 1.7     | 118.4 $\pm$ 5.6  |
|        | MMP-9 (ng/mL)              | 52 $\pm$ 0.8      | 49.8 $\pm$ 0.5   | 49.1 $\pm$ 0.7      | 50 $\pm$ 1.5     | 51.6 $\pm$ 1        | 52.5 $\pm$ 1.6   |
| Kidney | IL-6 (pg/mgprot)           | 49.1 $\pm$ 1.1    | 49.1 $\pm$ 1.2   | 44.4 $\pm$ 0.9      | 35.6 $\pm$ 1.3   | 32.8 $\pm$ 0.6      | 33.8 $\pm$ 1.8   |
|        | IL-8 (pg/mgprot)           | 31.5 $\pm$ 1.1    | 31.1 $\pm$ 1.7   | 35.7 $\pm$ 1.3      | 31.7 $\pm$ 3.6   | 30 $\pm$ 3.1        | 28.5 $\pm$ 0.5   |
|        | TNF- $\alpha$ (pg/ mgprot) | 13.7 $\pm$ 0.3    | 15 $\pm$ 0.4     | 17.3 $\pm$ 2.2      | 14.2 $\pm$ 0.4   | 13.5 $\pm$ 0.3      | 13.4 $\pm$ 0.6   |
|        | ICAM-1 (ng/ mgprot)        | 103.8 $\pm$ 4.7   | 102.8 $\pm$ 4.1  | 114.9 $\pm$ 5.3     | 115.6 $\pm$ 9.7  | 97.1 $\pm$ 2.9      | 101.1 $\pm$ 2.9  |
|        | ICAM-2 (nmol/ mgprot)      | 21.7 $\pm$ 0.5    | 20.5 $\pm$ 0.1   | 22.2 $\pm$ 1.1      | 16.4 $\pm$ 0.6   | 17 $\pm$ 0.5        | 16.5 $\pm$ 0.5   |
|        | MCP-5 (pg/mgprot)          | 133.5 $\pm$ 8     | 127.4 $\pm$ 5.8  | 148.2 $\pm$ 3       | 127.4 $\pm$ 11.1 | 154.1 $\pm$ 2.5     | 133.5 $\pm$ 3.2  |
|        | MMP-9 (ng/ mgprot)         | 24.8 $\pm$ 0.7    | 22.5 $\pm$ 0.2   | 23.7 $\pm$ 0.5      | 19.8 $\pm$ 0.9   | 20.1 $\pm$ 0.6      | 20.2 $\pm$ 0.8   |
